# Supplementary material for: Choice of radiotherapy modality for the combined treatment of non-small cell lung cancer with brain metastases: whole-brain radiation therapy with simultaneous integrated boost or stereotactic radiosurgery
Source: PubMed Central journal article supplement (PMC10556697; doi:10.3389/fonc.2023.1220047), 2023-09-22

Strata + No + Yes

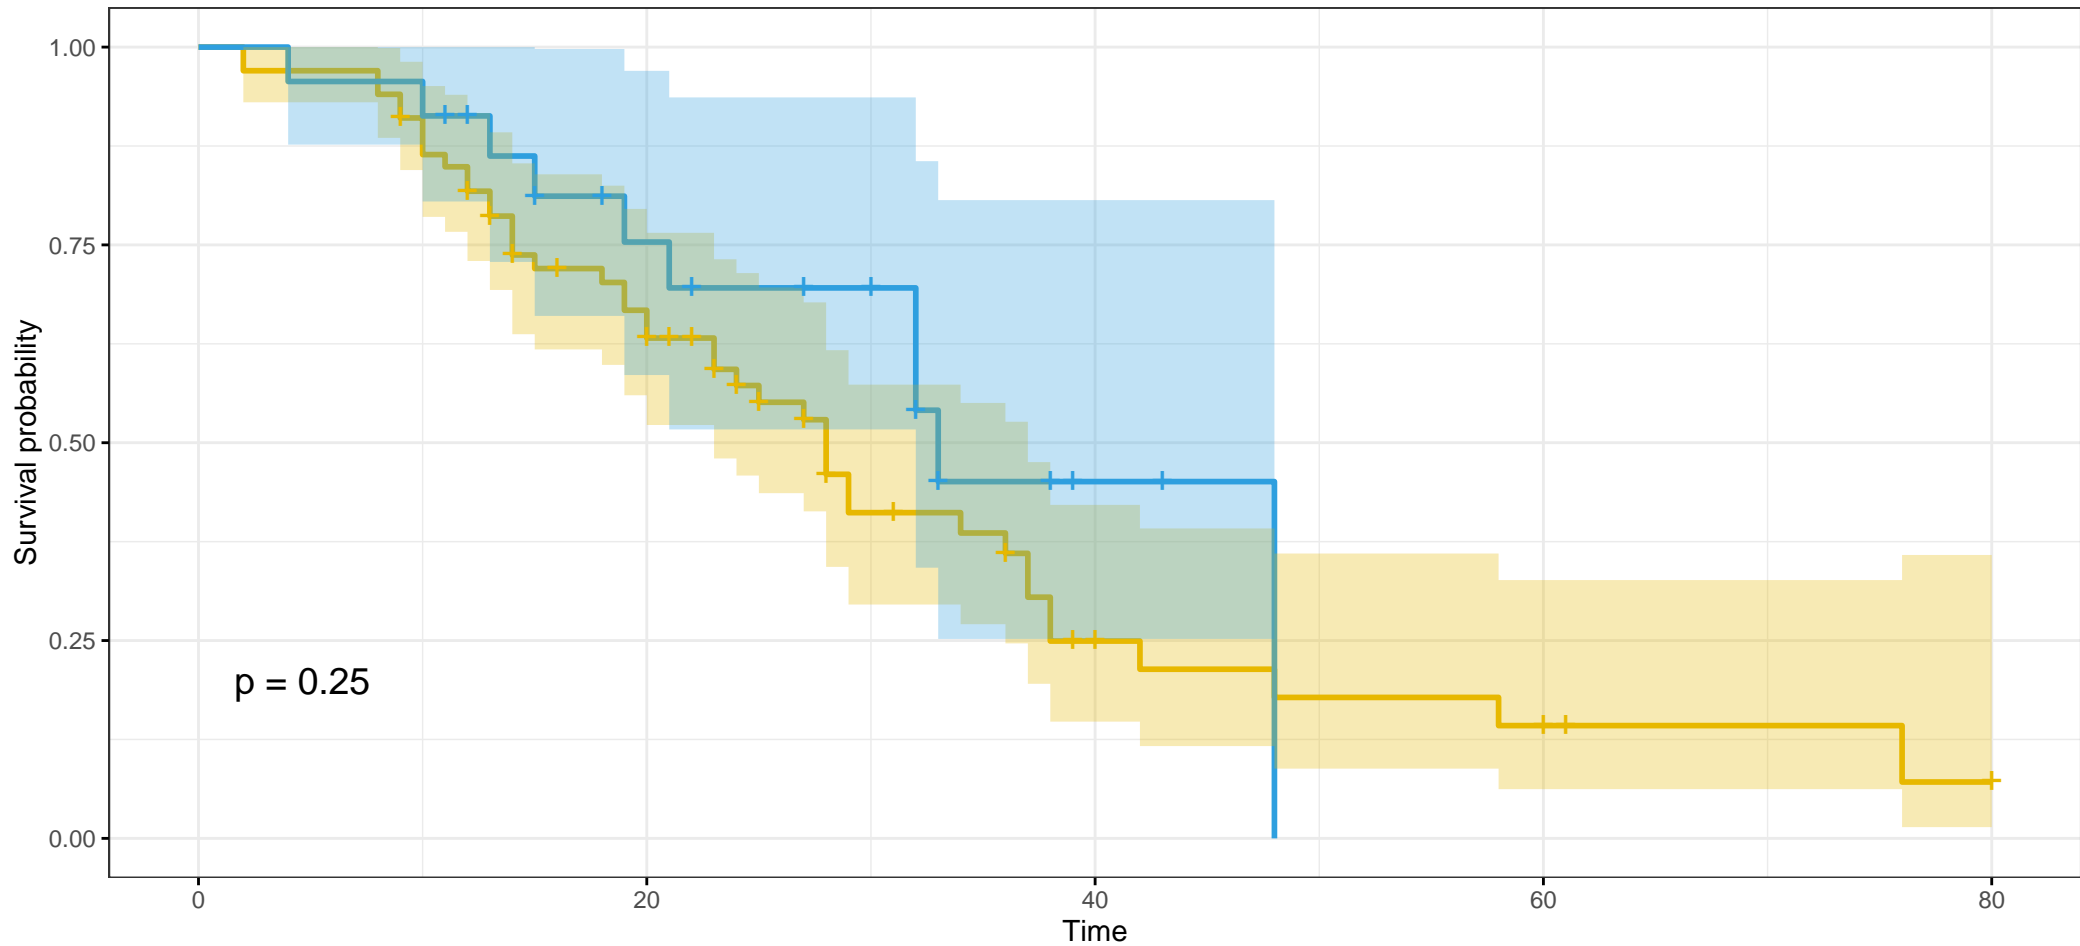

Number at risk

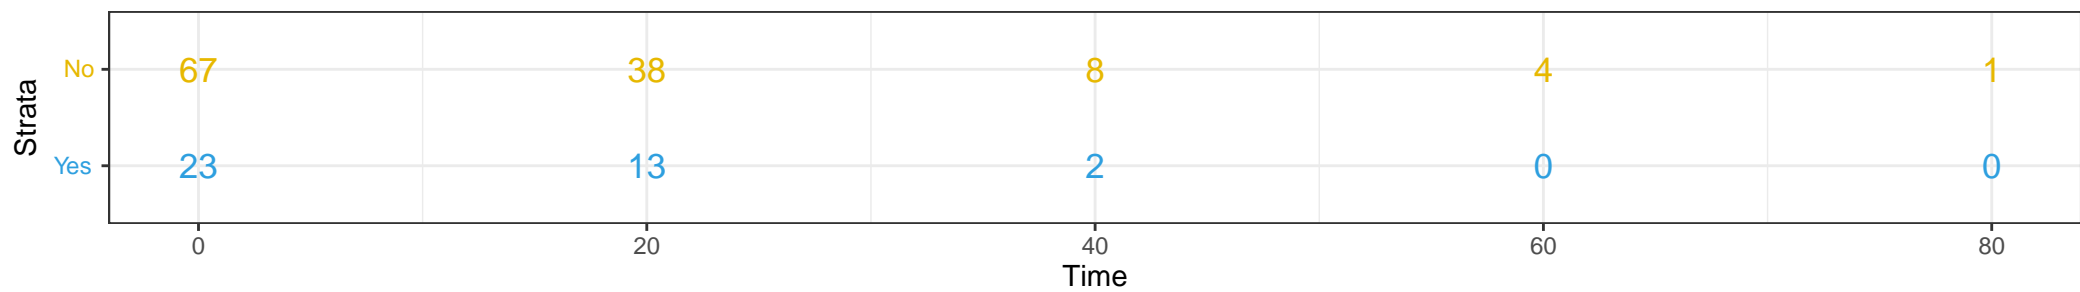

Supplement: DataSheet_3.pdf [file DataSheet_3.pdf]
